# Supplementary material for: Controlled synthesis of Mn3O4 nanoparticles in ionic liquids
Source: Royal Society of Chemistry journal article supplement (doi:10.1039/c3dt32348j), 2013-01-01
Supplement: c3dt32348j.pdf [file c3dt32348j.pdf]

## Electronic supplementary information

### Controlled synthesis of $\text{Mn}_3\text{O}_4$ nanoparticles in ionic liquids

Roberta Bussamara,<sup>a</sup> Wellington W. M. Melo,<sup>b</sup> Jackson D. Scholten,<sup>a</sup> Pedro Migowski,<sup>a</sup> Graciane Marin,<sup>a</sup> Giovanna Machado,<sup>c</sup> Sérgio R. Teixeira,<sup>d</sup> Miguel A. Novak<sup>b</sup> and Jairton Dupont<sup>\*a</sup>

5

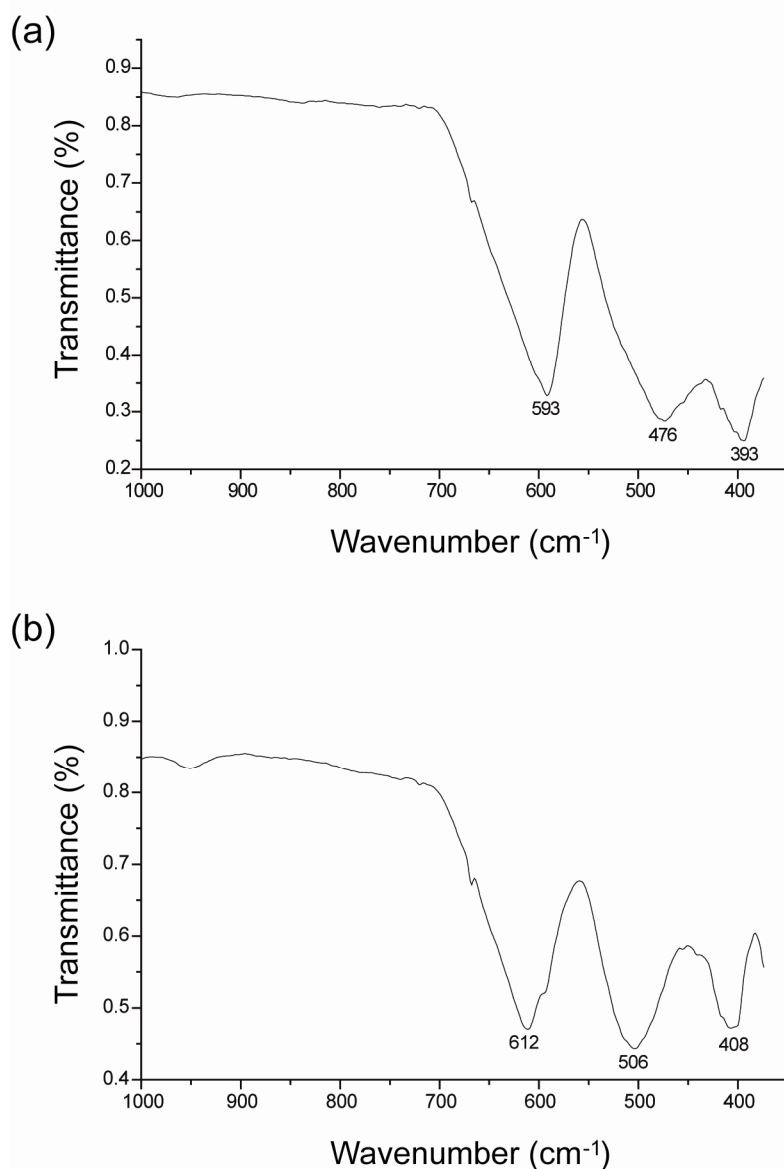

Fig. S1 ATR-FTIR spectra of  $\text{Mn}_3\text{O}_4$  synthesized with using the (a) conventional solvent oleylamine and (b) BMI.NTf<sub>2</sub>.

10

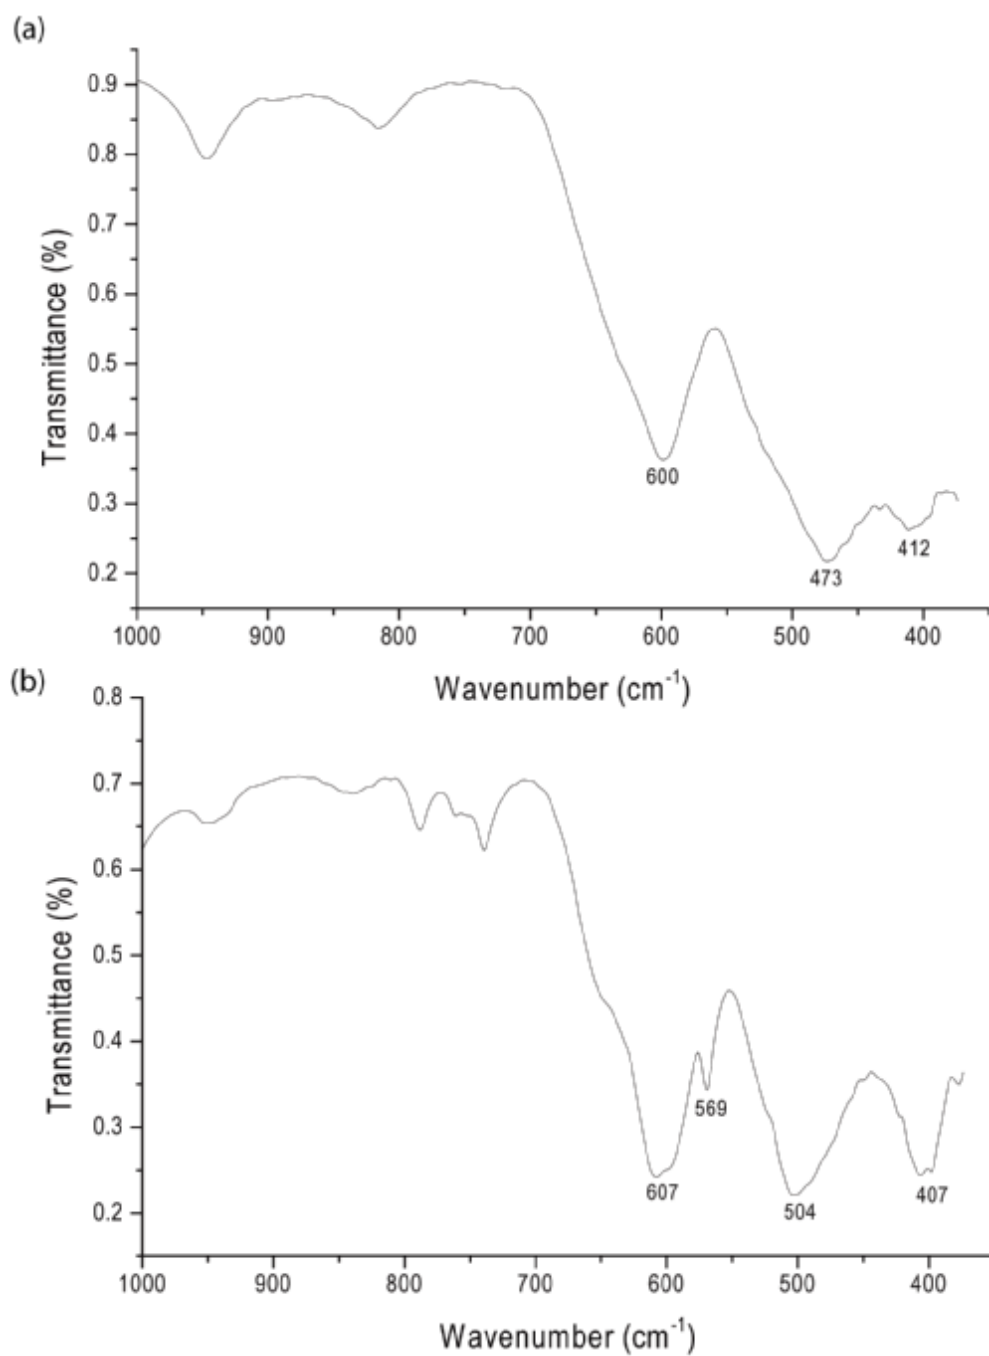

5

**Fig. S2** ATR-FTIR spectra of  $\text{Mn}_3\text{O}_4$  synthesized with using the (a) conventional solvent oleylamine and (b) BMI.NTf2 after 96 h reaction.

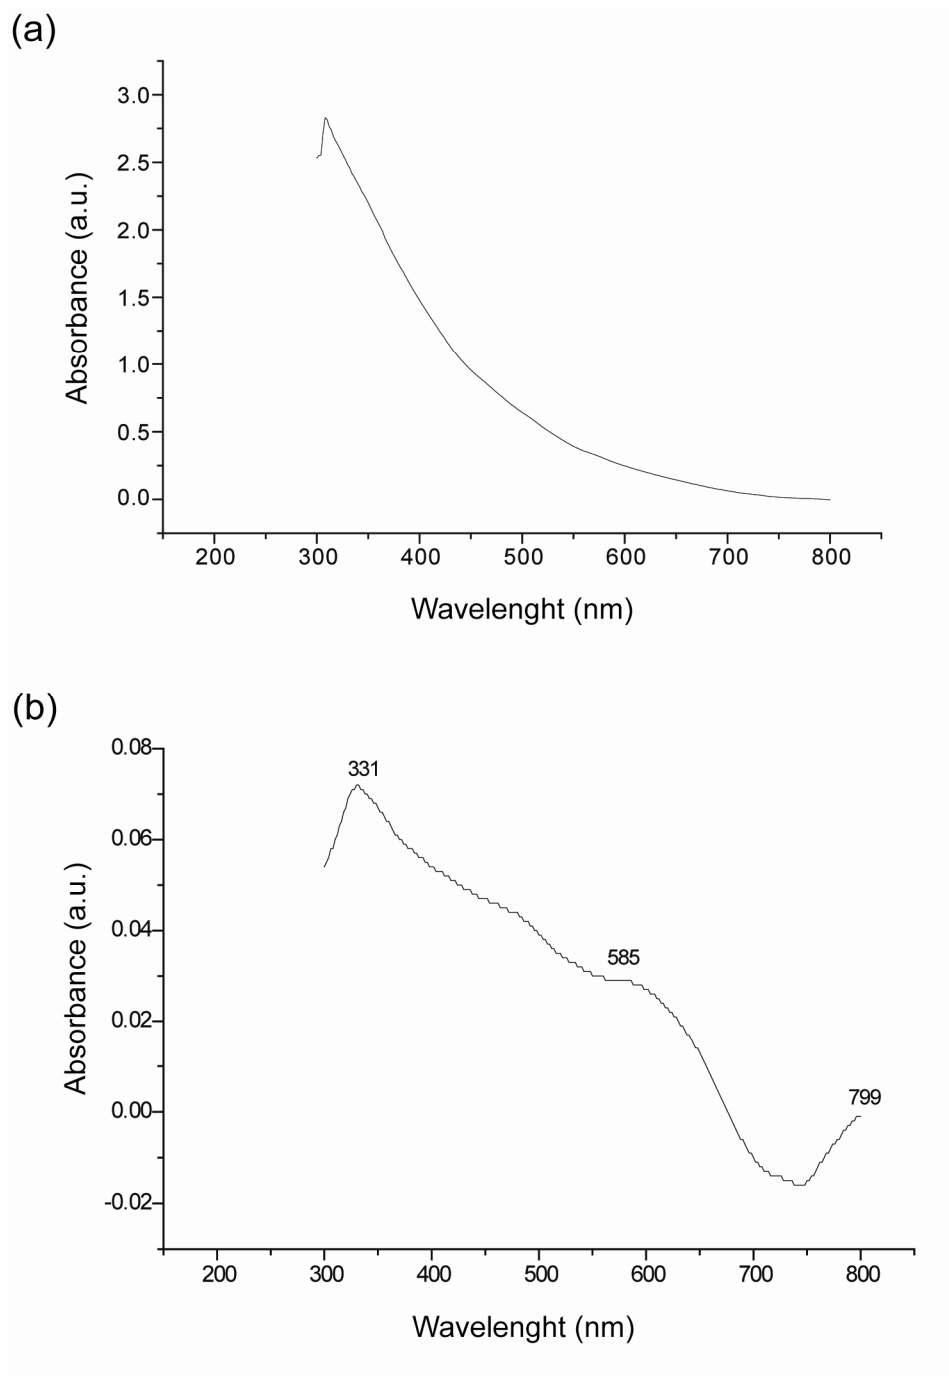

Fig. S3 UV/VIS spectra of solutions of  $Mn_3O_4$  synthesized with (a) oleylamine and (b)  $BMINTf_2$ .

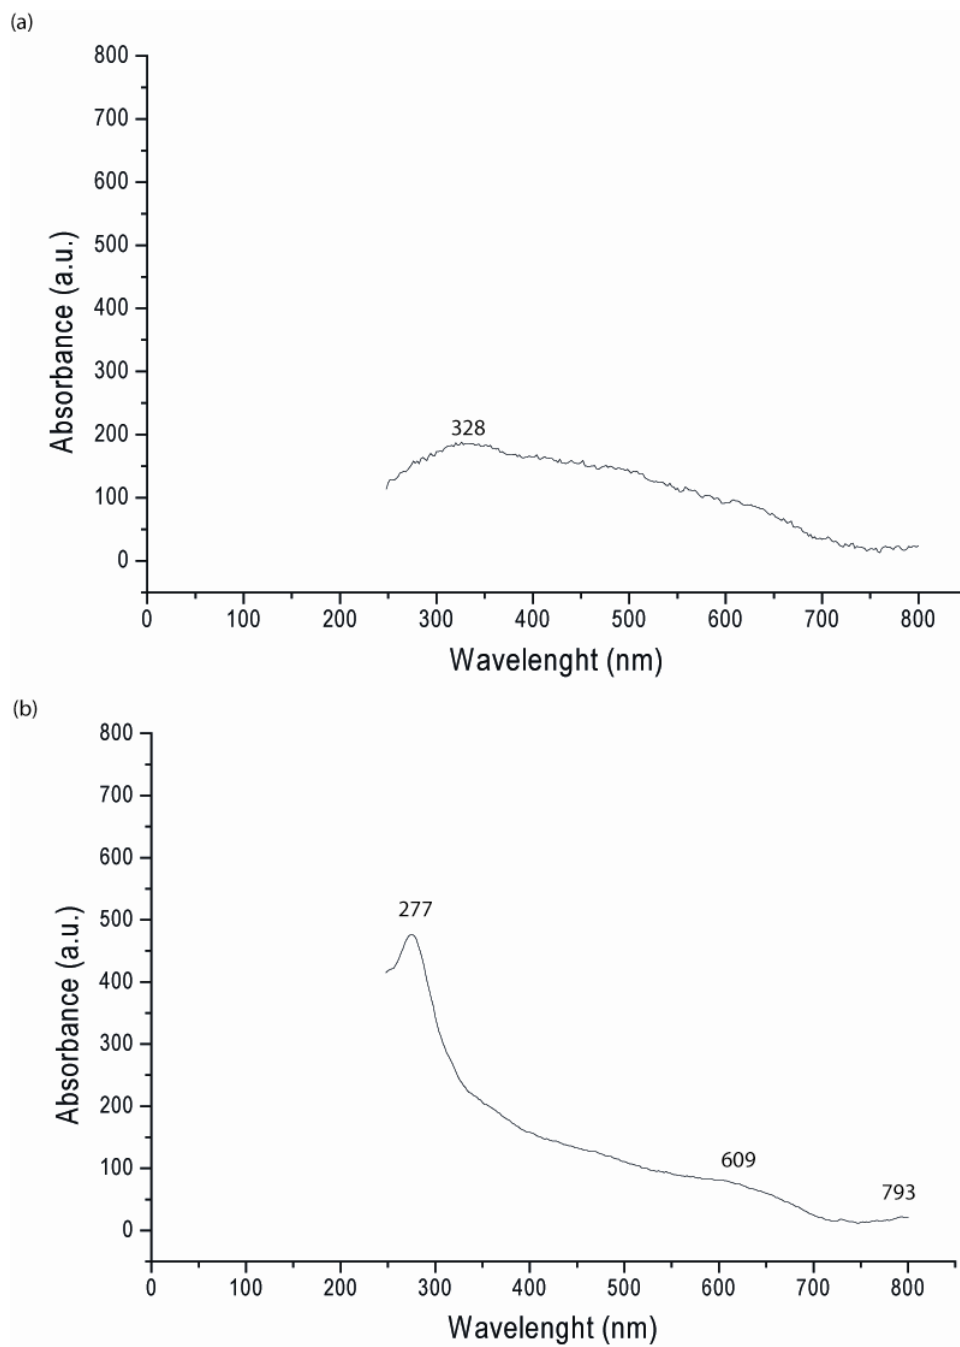

**Fig. S4** UV/VIS spectra of solutions of  $Mn_3O_4$  synthesized with (a) oleylamine and (b)  $BMI \cdot NTf_2$  after 96 h reaction.
